# Supplementary material for: Glucose controls lipolysis through Golgi PtdIns4P-mediated regulation of ATGL
Source: PubMed Central journal article supplement (PMC11021197; doi:10.1038/s41556-024-01386-y), 2024-04-01

Extended Data Fig.1

a: Liver

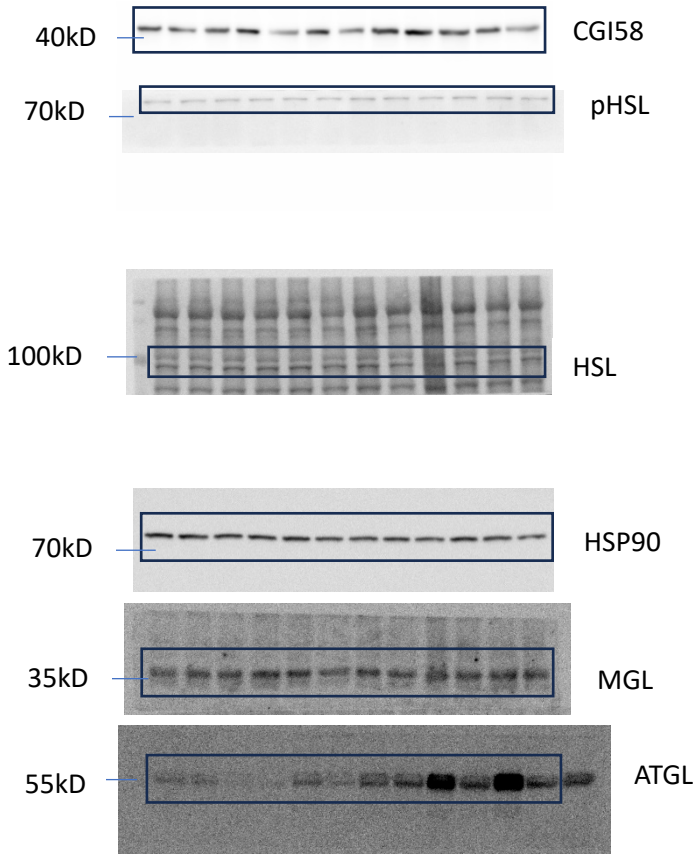

a: iBAT

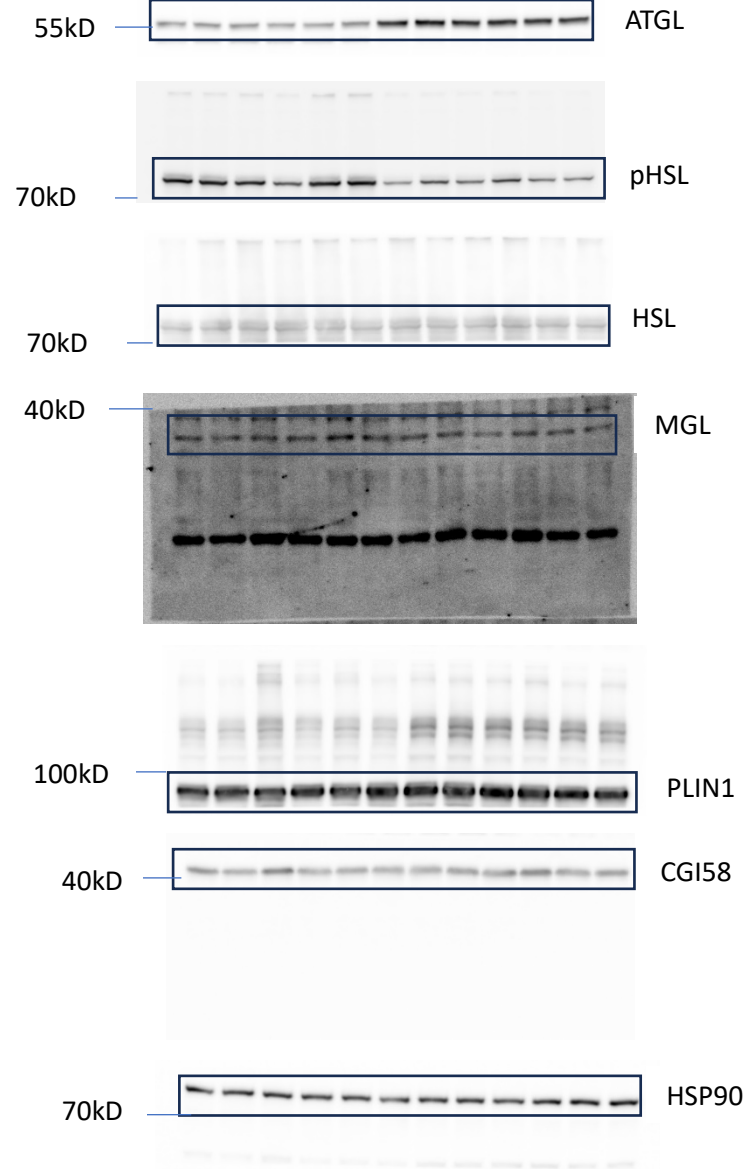

a: iWAT

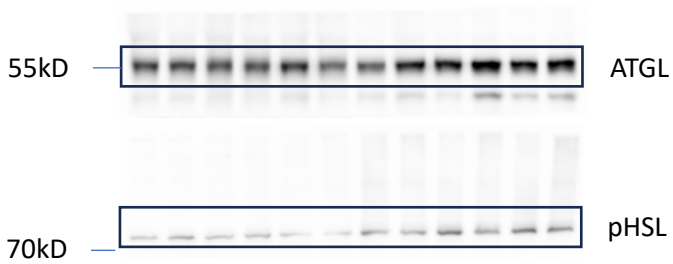

a: gWAT

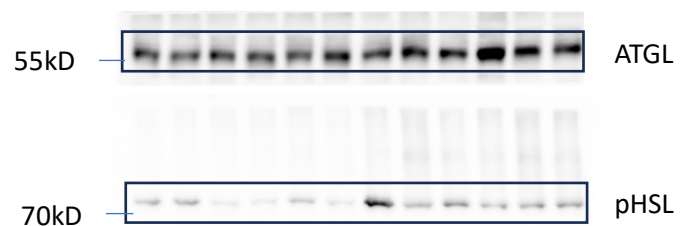

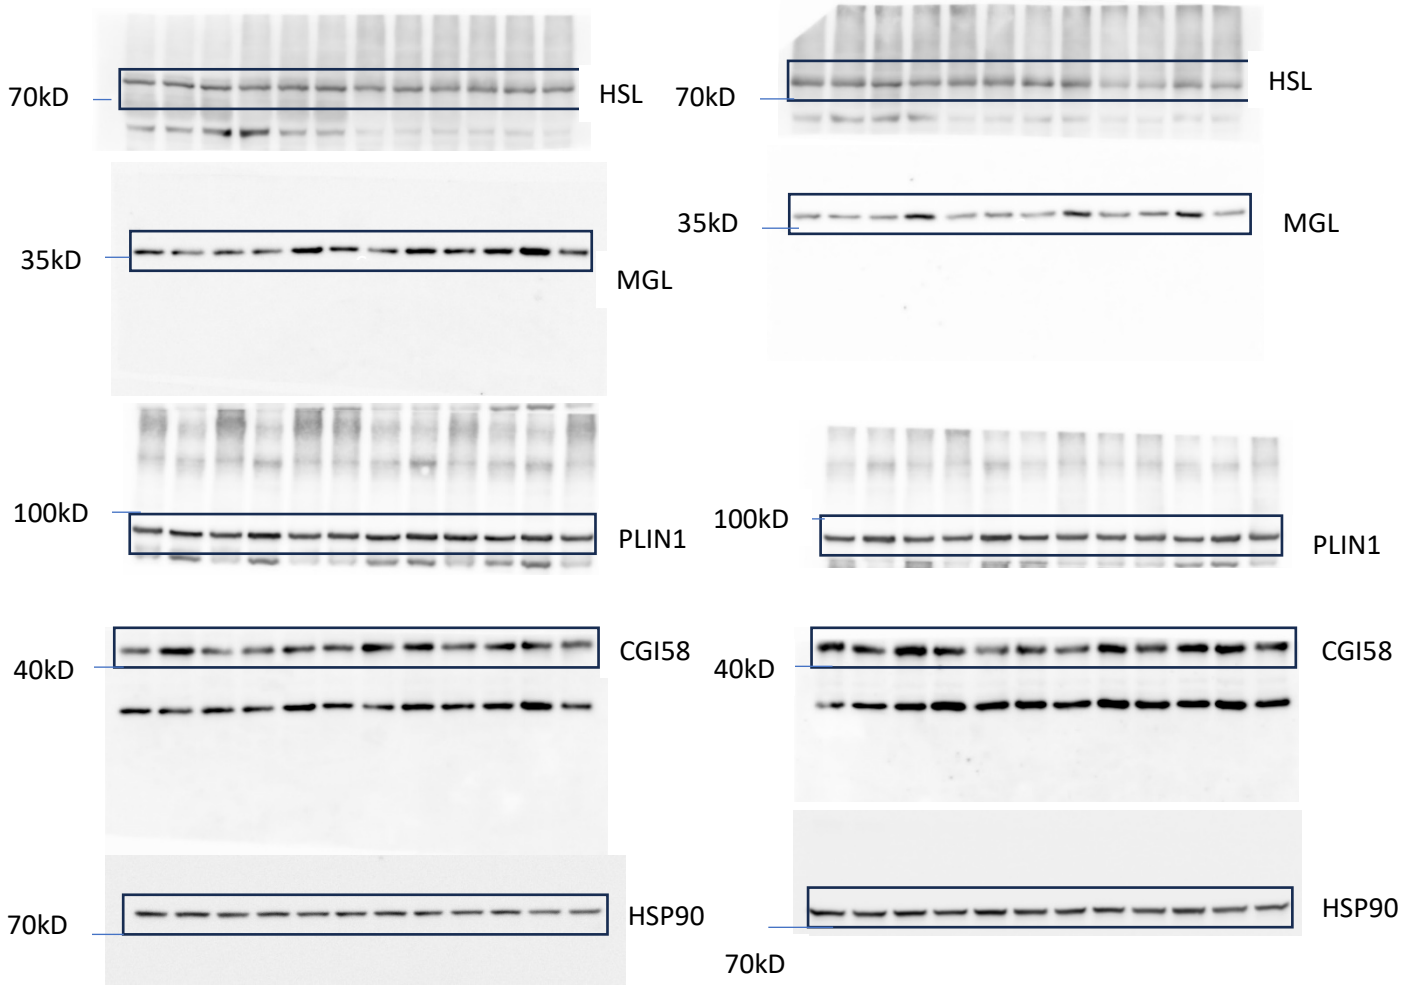

g: Liver 1h

g: iBAT 1h

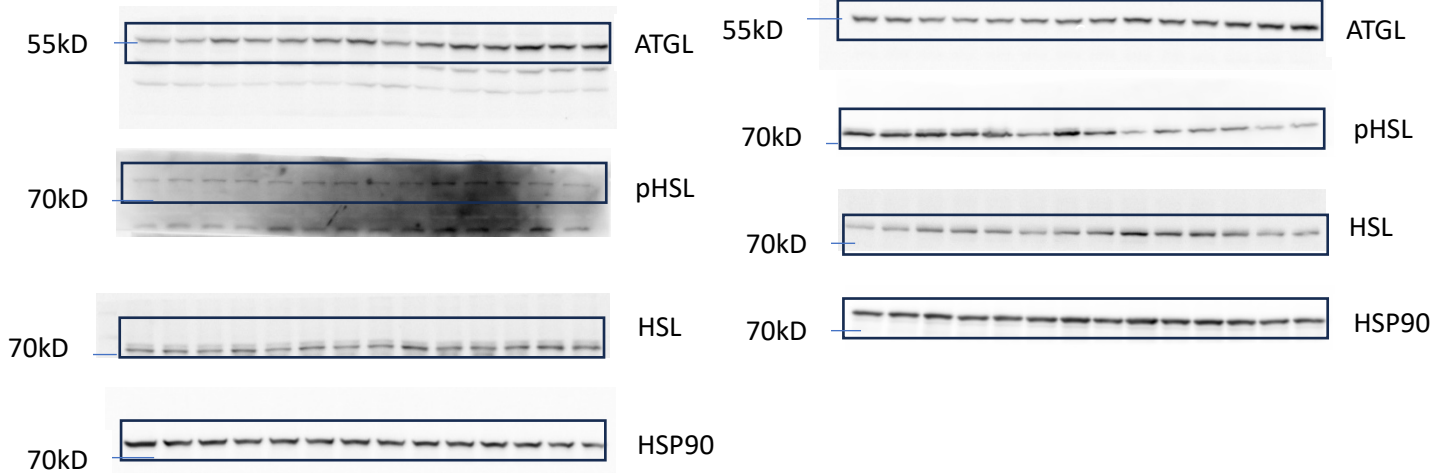

g: iWAT 1h

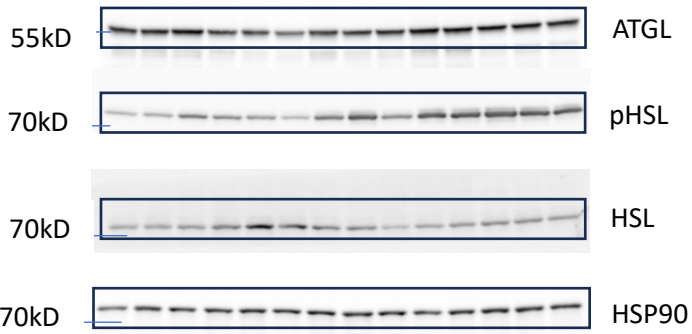

g: gWAT 1h

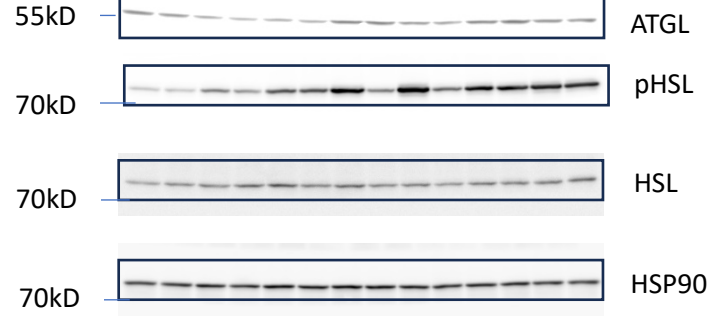

g: Liver 6h

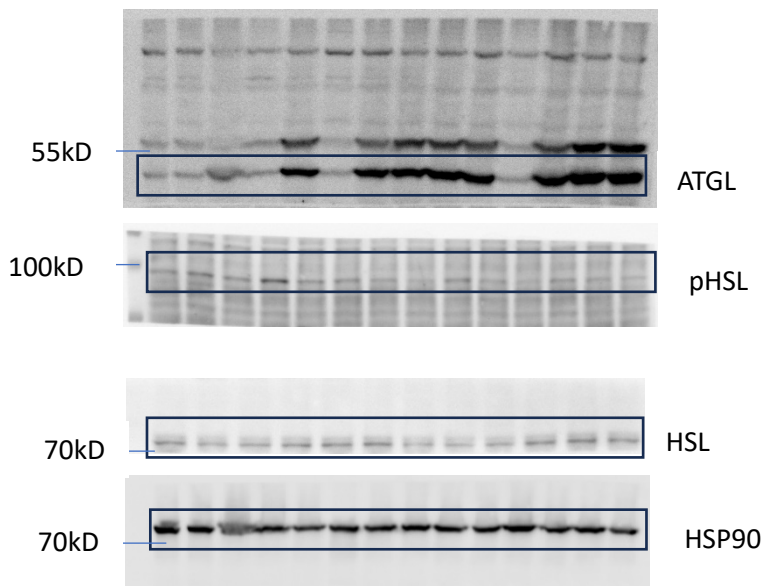

g: iBAT 6h

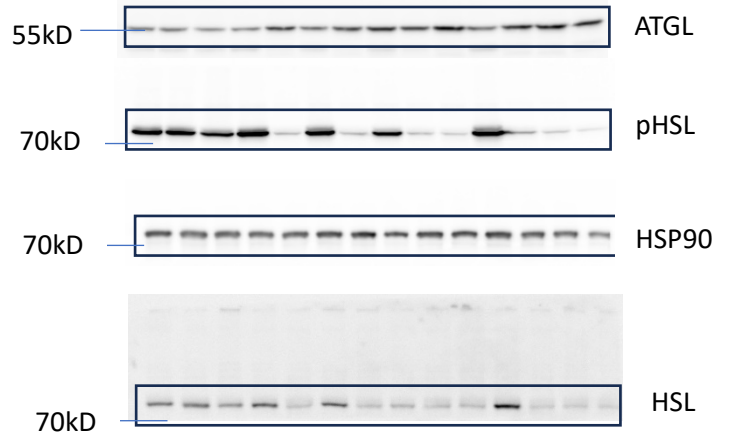

g: iWAT 6h

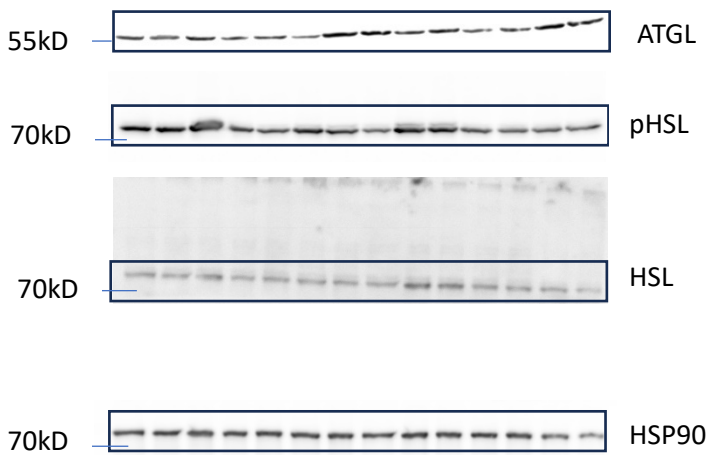

g: gWAT 6h

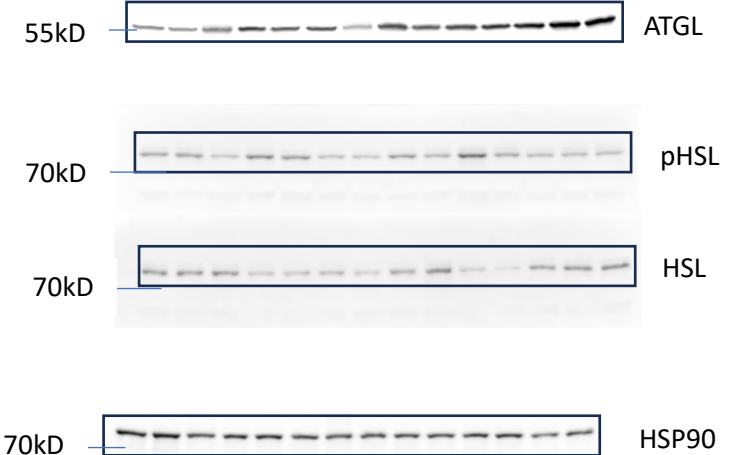

g: Liver 12h

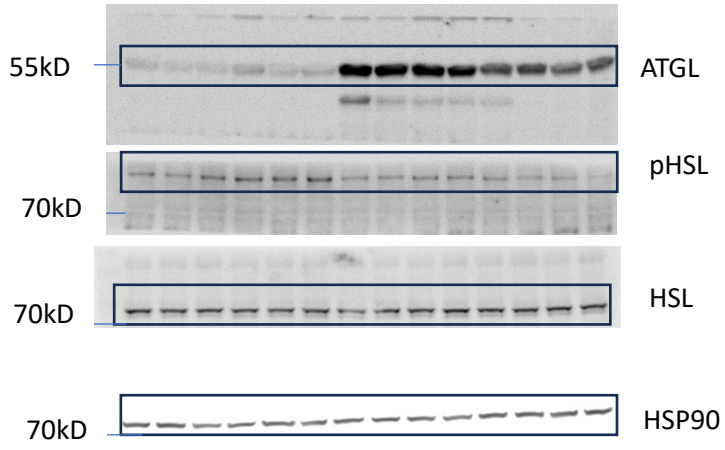

g: iBAT 12h

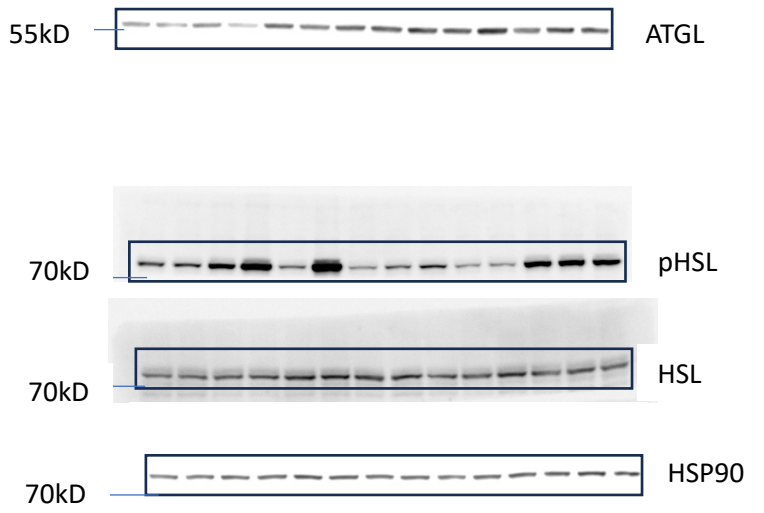

g: iWAT 12h

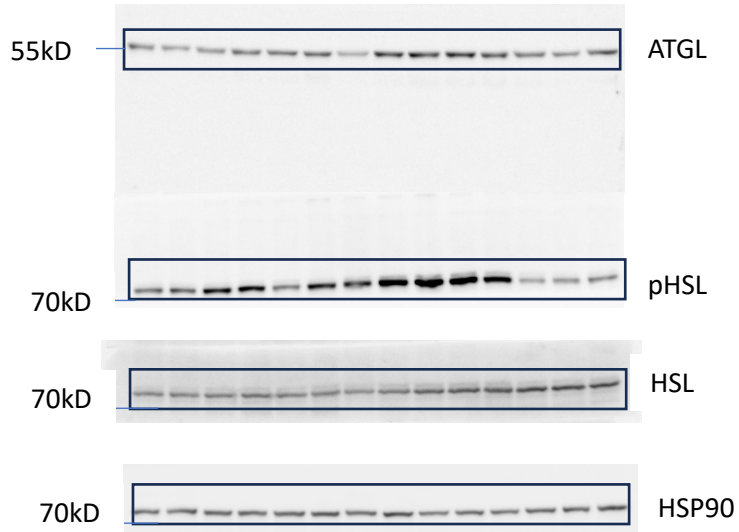

g: gWAT 12h

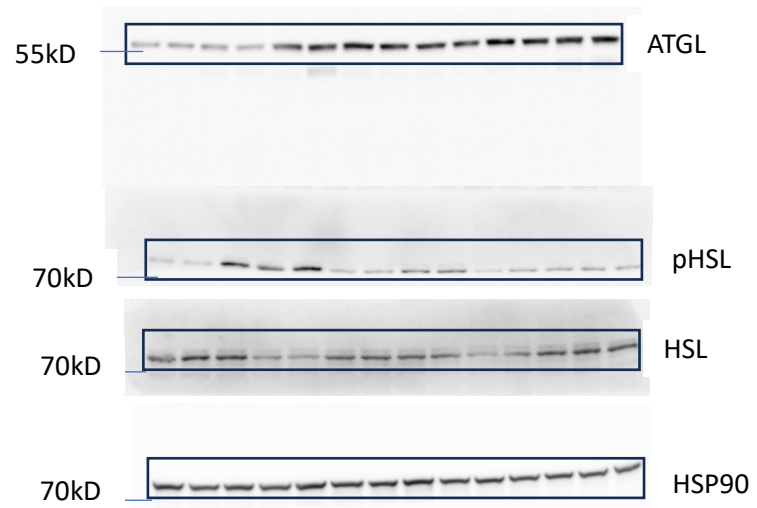

Supplement: 41556_2024_1386_MOESM16_ESM.pdf [file 41556_2024_1386_MOESM16_ESM.pdf]
