# Supplementary material for: Glucose controls lipolysis through Golgi PtdIns4P-mediated regulation of ATGL
Source: PubMed Central journal article supplement (PMC11021197; doi:10.1038/s41556-024-01386-y), 2024-04-01

Fig.7

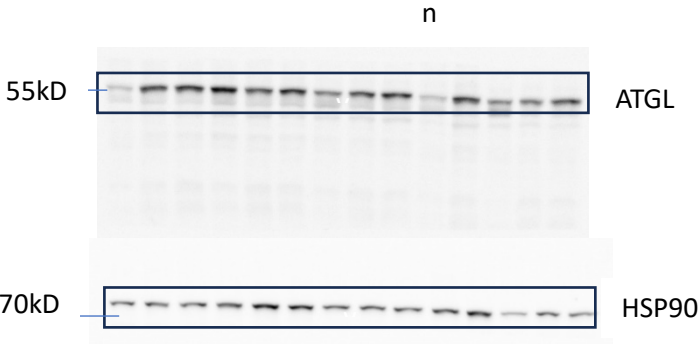

Supplement: 41556_2024_1386_MOESM14_ESM.pdf [file 41556_2024_1386_MOESM14_ESM.pdf]
